# Supplementary material for: A DFT study of the Karplus-type dependence of vicinal 3J(Sn–C-X-C), X=N,O,S, in organotin(iv) compounds: application to conformationally flexible systems
Source: Royal Society of Chemistry journal article supplement (doi:10.1039/c000679c), 2010-01-01
Supplement: c000679c.pdf [file c000679c.pdf]

# A DFT study of the Karplus-type dependence of vicinal ${}^3J(\text{Sn-C-X-C})$ , X=N,O,S, in organotin(IV) compounds: application to conformationally flexible systems

Girolamo Casella,<sup>[a]</sup> Francesco Ferrante,<sup>[b]</sup> and Giacomo Saielli\*<sup>[c]</sup>

## Supporting Information

|                                                                                                                                                                                                   |           |
|---------------------------------------------------------------------------------------------------------------------------------------------------------------------------------------------------|-----------|
| Table S1: Experimental (absolute values) and calculated vicinal coupling constants, ${}^3J(\text{Sn-C-X-C})$ , in Hz,<br>for the compounds of Scheme 1, <b>L5</b> , with several functionals..... | p. S2     |
| Table S2: Experimental (absolute values) and calculated vicinal coupling constants, ${}^3J(\text{Sn-C-X-C})$ , in Hz,<br>for the compounds of Scheme 2, <b>L5</b> , with several functionals..... | p. S3     |
| Scheme S1: Structures of <i>N</i> -methyl-2-(trimethylstannyl)piperidine conformers.....                                                                                                          | p. S4-S5  |
| Table S3: Energies and Cartesian Coordinates of <i>N</i> -methyl-2-(trimethylstannyl)piperidine conformers.....                                                                                   | p. S6-S10 |
| Table S4: Contribution to ${}^3J(\text{Sn-C-O-C})$ of $\text{Me}_3\text{Sn-CH}_2\text{-O-CH}_3$ .....                                                                                             | p. S11    |
| Figure S1: Contribution to ${}^3J(\text{Sn-C-O-C})$ of $\text{Me}_3\text{Sn-CH}_2\text{-O-CH}_3$ .....                                                                                            | p. S11    |

**Table S1** Experimental (absolute values) and calculated vicinal coupling constants,  $^3J(\text{Sn-C-X-C})$ , in Hz, for the compounds of Scheme 1, **L5**, with several functionals.

| Compound             | Functional |       |        |          |       |       |         |        | Exp.        |
|----------------------|------------|-------|--------|----------|-------|-------|---------|--------|-------------|
|                      | B3LYP      | B3P86 | B3PW91 | MPW1PW91 | O3LYP | OLYP  | PBE1PBE | PBEPBE |             |
| <b>1</b>             |            |       |        |          |       |       |         |        |             |
| $^3J(\text{SnCSC})$  | -30.1      | -29.0 | -29.1  | -29.4    | -29.3 | -29.3 | -29.5   | -29.0  | <b>32.4</b> |
| <b>2</b>             |            |       |        |          |       |       |         |        |             |
| $^3J(\text{SnCOC})$  | -34.7      | -35.1 | -35.8  | -35.7    | -37.3 | -38.8 | -36.0   | -36.0  | <b>39.0</b> |
| <b>3</b>             |            |       |        |          |       |       |         |        |             |
| $^3J(\text{SnCOC})$  | -29.1      | -29.8 | -30.0  | -29.7    | -31.3 | -32.8 | -30.0   | -32.2  | <b>34.0</b> |
| $^3J(\text{SnCNC})$  | -12.6      | -13.2 | -13.4  | -13.8    | -13.8 | -13.4 | -13.9   | -12.2  | <b>14.5</b> |
| <b>4a</b>            |            |       |        |          |       |       |         |        |             |
| $^3J(\text{SnCNC})$  | -22.8      | -23.1 | -23.2  | -23.5    | -23.6 | -24.0 | -23.5   | -23.6  | <b>30.5</b> |
| $^3J(\text{SnCNMe})$ | -3.3       | -2.9  | -2.8   | -2.8     | -2.9  | -3.5  | -3.0    | -4.0   | <b>5.8</b>  |
| <b>4b</b>            |            |       |        |          |       |       |         |        |             |
| $^3J(\text{SnCNMe})$ | -2.1       | -2.2  | -2.3   | -2.5     | -2.1  | -1.6  | -2.6    | -1.3   | <b>11.8</b> |

**Table S2** Experimental (absolute values) and calculated vicinal coupling constants,  $^3J(\text{Sn-C-X-C})$ , in Hz, for the compounds of Scheme 2, L5, with several functionals.

| Compound                       | Functional                                 |                                            |                                            |                                            |                                            |                                            |                                            |                                            | Exp.         |
|--------------------------------|--------------------------------------------|--------------------------------------------|--------------------------------------------|--------------------------------------------|--------------------------------------------|--------------------------------------------|--------------------------------------------|--------------------------------------------|--------------|
|                                | B3LYP                                      | B3P86                                      | B3PW91                                     | MPW1PW91                                   | O3LYP                                      | OLYP                                       | PBE1PBE                                    | PBEPBE                                     |              |
|                                | $^3J(\text{SnCNC})$<br>$^3J(\text{SnCOC})$ |              |
| <b>6cis syn</b>                | -7.15                                      | -7.50                                      | -7.56                                      | -7.84                                      | -7.63                                      | -7.52                                      | -8.01                                      | -7.37                                      | <b>10.3</b>  |
|                                | -35.86                                     | -36.91                                     | -37.06                                     | -36.97                                     | -38.90                                     | -40.55                                     | -37.42                                     | -39.70                                     | <b>35.5</b>  |
| <b>6cis anti</b>               | 1.31                                       | 1.33                                       | 1.31                                       | 1.03                                       | 1.83                                       | 2.50                                       | 1.02                                       | 2.24                                       | <b>10.3</b>  |
|                                | 2.47                                       | 2.42                                       | 2.53                                       | 2.44                                       | 3.15                                       | 3.35                                       | 2.38                                       | 2.53                                       | <b>35.5</b>  |
| <b>6trans syn</b>              | 1.02                                       | 0.86                                       | 0.81                                       | 0.50                                       | 1.31                                       | 1.98                                       | 0.50                                       | 1.85                                       | <b>8.0</b>   |
|                                | 2.90                                       | 2.85                                       | 2.93                                       | 2.82                                       | 3.53                                       | 3.74                                       | 2.78                                       | 3.00                                       | <b>27.5</b>  |
| <b>6trans anti</b>             | -7.20                                      | -8.26                                      | -8.39                                      | -8.72                                      | -8.51                                      | -8.44                                      | -8.86                                      | -8.03                                      | <b>8.0</b>   |
|                                | -32.30                                     | -34.87                                     | -35.03                                     | -34.86                                     | -36.72                                     | -38.30                                     | -35.24                                     | -37.48                                     | <b>27.5</b>  |
| <b>7cis syn</b>                | 1.81                                       | 1.79                                       | 1.79                                       | 1.58                                       | 2.32                                       | 2.87                                       | 1.58                                       | 2.51                                       | <b>10.6</b>  |
|                                | 3.59                                       | 3.62                                       | 3.74                                       | 3.63                                       | 4.54                                       | 4.86                                       | 3.58                                       | 3.86                                       | <b>35.1</b>  |
| <b>7cis anti</b>               | -8.37                                      | -8.73                                      | -8.78                                      | -9.03                                      | -8.85                                      | -8.85                                      | -9.19                                      | -8.8                                       | <b>10.6</b>  |
|                                | -37.56                                     | -38.69                                     | -38.83                                     | -38.74                                     | -40.67                                     | -42.48                                     | -39.22                                     | -41.81                                     | <b>35.1</b>  |
| <b>7trans syn</b>              | -7.47                                      | -8.13                                      | -8.3                                       | -8.69                                      | -8.41                                      | -8.2                                       | -8.83                                      | -7.65                                      | <b>7.0</b>   |
|                                | -36.74                                     | -37.91                                     | -38.01                                     | -37.83                                     | -39.5                                      | -41.16                                     | -38.22                                     | -40.78                                     | <b>28.6</b>  |
| <b>7trans anti</b>             | 2.41                                       | 2.32                                       | 2.34                                       | 2.20                                       | 2.81                                       | 3.19                                       | 2.18                                       | 2.18                                       | <b>7.0</b>   |
|                                | 3.38                                       | 3.44                                       | 3.57                                       | 3.46                                       | 4.31                                       | 4.60                                       | 3.41                                       | 3.41                                       | <b>28.6</b>  |
| <b>8cis syn</b>                | -5.48                                      | -5.78                                      | -5.84                                      | -6.14                                      | -5.75                                      | -5.51                                      | -6.26                                      | -5.42                                      | <b>7.0</b>   |
|                                | -30.61                                     | -32.05                                     | -32.27                                     | -32.39                                     | -33.35                                     | -34.43                                     | -32.66                                     | -33.78                                     | <b>19.1</b>  |
| <b>8cis trans</b>              | 2.07                                       | 2.03                                       | 2.04                                       | 1.83                                       | 2.61                                       | 3.16                                       | 1.82                                       | 2.66                                       | <b>7.0</b>   |
|                                | 2.36                                       | 2.35                                       | 2.45                                       | 2.40                                       | 2.98                                       | 3.05                                       | 2.34                                       | 2.28                                       | <b>19.1</b>  |
| <b>8trans syn</b>              | -10.79                                     | -10.24                                     | -10.43                                     | -10.75                                     | -10.76                                     | -9.49                                      | -10.92                                     | -10.15                                     | <b>10.7</b>  |
|                                | -35.10                                     | -32.61                                     | -32.73                                     | -32.74                                     | -33.94                                     | -31.38                                     | -33.10                                     | -34.55                                     | <b>38.5</b>  |
| <b>8trans anti<sup>a</sup></b> | -                                          | -                                          | -                                          | -                                          | -                                          | -                                          | -                                          | -                                          | <b>10.7</b>  |
|                                | -                                          | -                                          | -                                          | -                                          | -                                          | -                                          | -                                          | -                                          | <b>38.5</b>  |
| <b>9cis anti<sup>a</sup></b>   | -                                          | -                                          | -                                          | -                                          | -                                          | -                                          | -                                          | -                                          | <b>7.0</b>   |
|                                | -                                          | -                                          | -                                          | -                                          | -                                          | -                                          | -                                          | -                                          | <b>10.0</b>  |
| <b>9cis syn</b>                | -5.31                                      | -5.60                                      | -5.64                                      | -5.77                                      | -5.80                                      | -5.99                                      | -5.92                                      | -5.99                                      | <b>7.0</b>   |
|                                | -28.94                                     | -30.06                                     | -30.22                                     | -30.41                                     | -31.36                                     | -32.22                                     | -30.76                                     | -31.49                                     | <b>10.0</b>  |
| <b>9trans syn</b>              | -3.94                                      | -4.37                                      | -4.46                                      | -4.74                                      | -4.43                                      | -4.31                                      | -4.90                                      | -4.19                                      | <b>7.0</b>   |
|                                | -29.56                                     | -30.84                                     | -31.08                                     | -31.24                                     | -32.14                                     | -32.91                                     | -31.44                                     | -31.92                                     | <b>28.2</b>  |
| <b>9trans anti</b>             | 1.57                                       | 1.45                                       | 1.40                                       | 1.12                                       | 1.92                                       | 2.52                                       | 1.11                                       | 2.27                                       | <b>7.0</b>   |
|                                | 1.20                                       | 1.14                                       | 1.22                                       | 1.12                                       | 1.60                                       | 1.65                                       | 1.06                                       | 1.10                                       | <b>28.2</b>  |
| <b>10cis syn</b>               | -33.3                                      | -34.1                                      | -34.3                                      | -34.6                                      | -35.6                                      | -36.3                                      | -34.9                                      | -35.3                                      | <b>41.2</b>  |
|                                | -9.8                                       | -10.0                                      | -10.0                                      | -10.0                                      | -10.0                                      | -10.2                                      | -10.2                                      | -10.6                                      | <b>14.0</b>  |
| <b>10cis anti</b>              | 3.13                                       | 3.00                                       | 3.09                                       | 3.13                                       | 3.56                                       | 3.53                                       | 3.09                                       | 2.68                                       | <b>41.2</b>  |
|                                | -1.32                                      | -1.43                                      | -1.19                                      | -1.08                                      | 0.12                                       | 0.01                                       | -1.18                                      | -2.39                                      | <b>14.0</b>  |
| <b>10trans syn</b>             | -11.6                                      | -12.3                                      | -12.5                                      | -12.9                                      | -12.6                                      | -12.4                                      | -13.0                                      | -11.8                                      | <b>10.3</b>  |
|                                | -46.8                                      | -48.0                                      | -48.0                                      | -47.9                                      | -49.6                                      | -51.3                                      | -48.2                                      | -50.8                                      | <b>34.7</b>  |
| <b>10trans anti</b>            |                                            | 3.38                                       | 3.47                                       | 3.45                                       | 3.96                                       | 4.11                                       | 3.39                                       | 3.30                                       | <b>10.30</b> |
|                                |                                            | 3.40                                       | 3.60                                       | 3.58                                       | 4.70                                       | 4.83                                       | 3.52                                       | 3.10                                       | <b>34.70</b> |

<sup>a</sup> Optimization not converged. See text .

**Scheme S1** Optimized conformers of *N*-methyl-2-(trimethylstannyl)piperidine, Xn: X= B(oat), C(hair), T(wist); n = 1,2,3,...,11 and cartesian coordinates of the studied models.

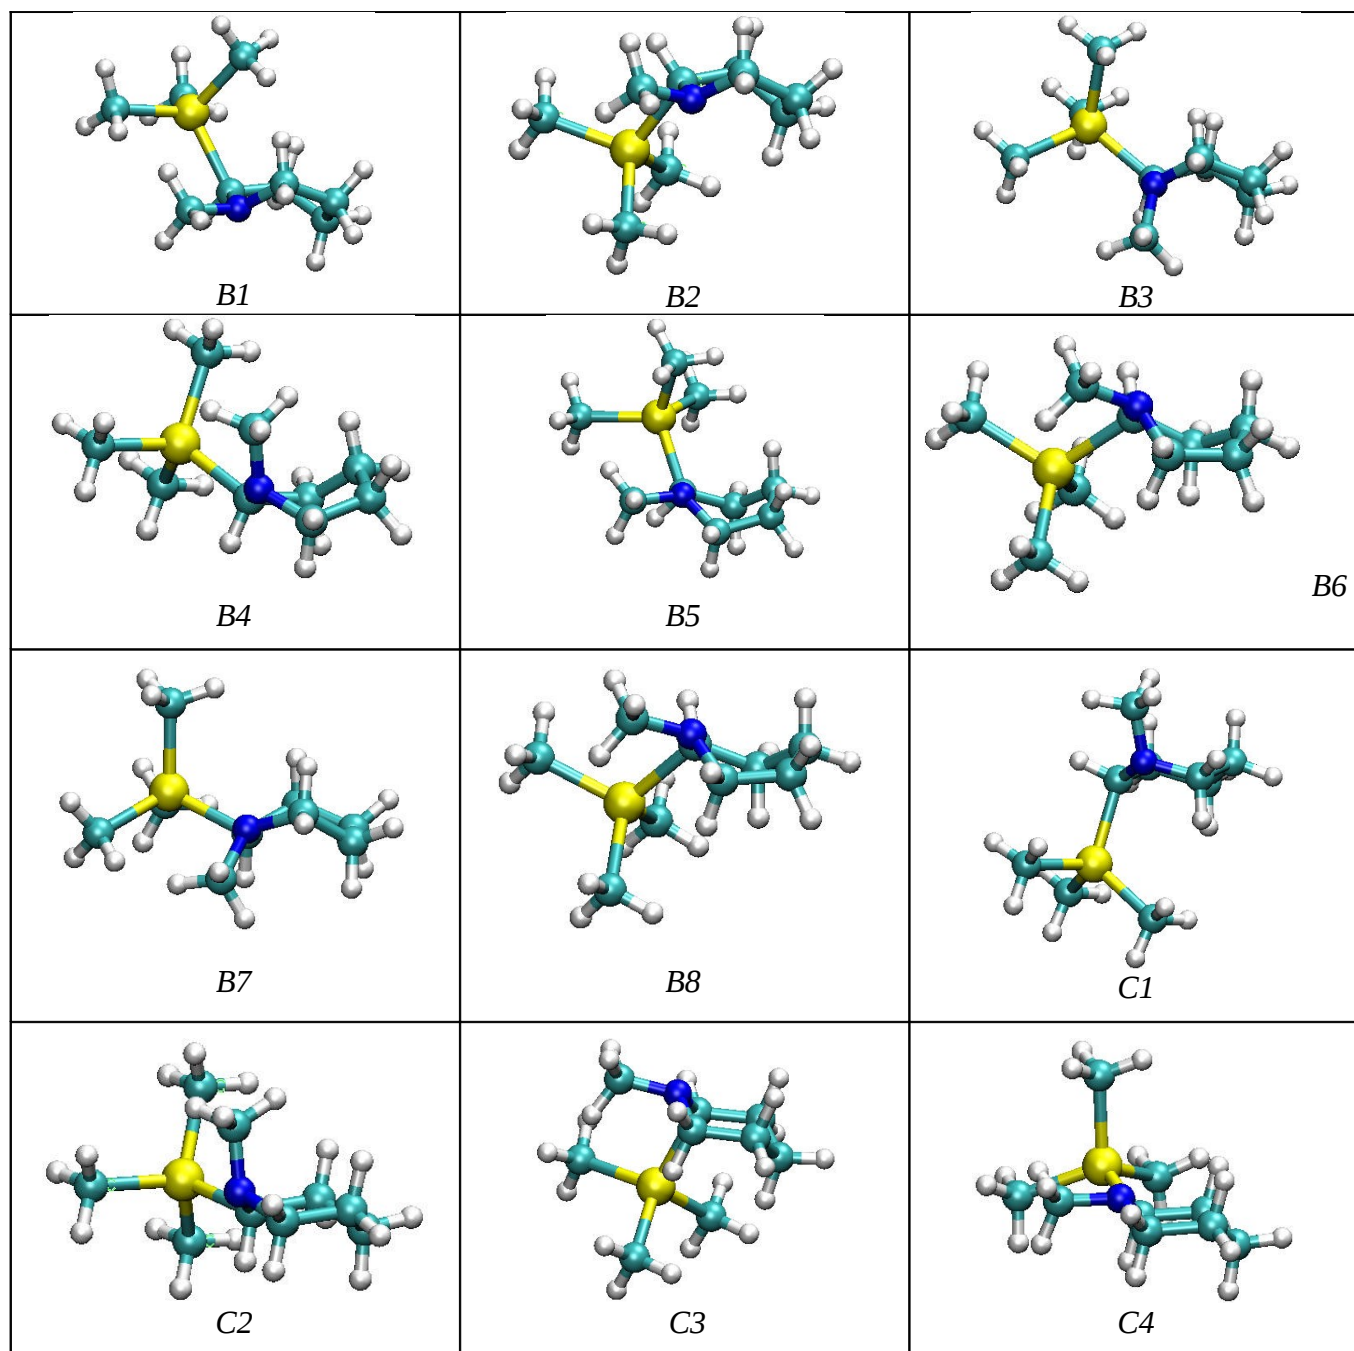

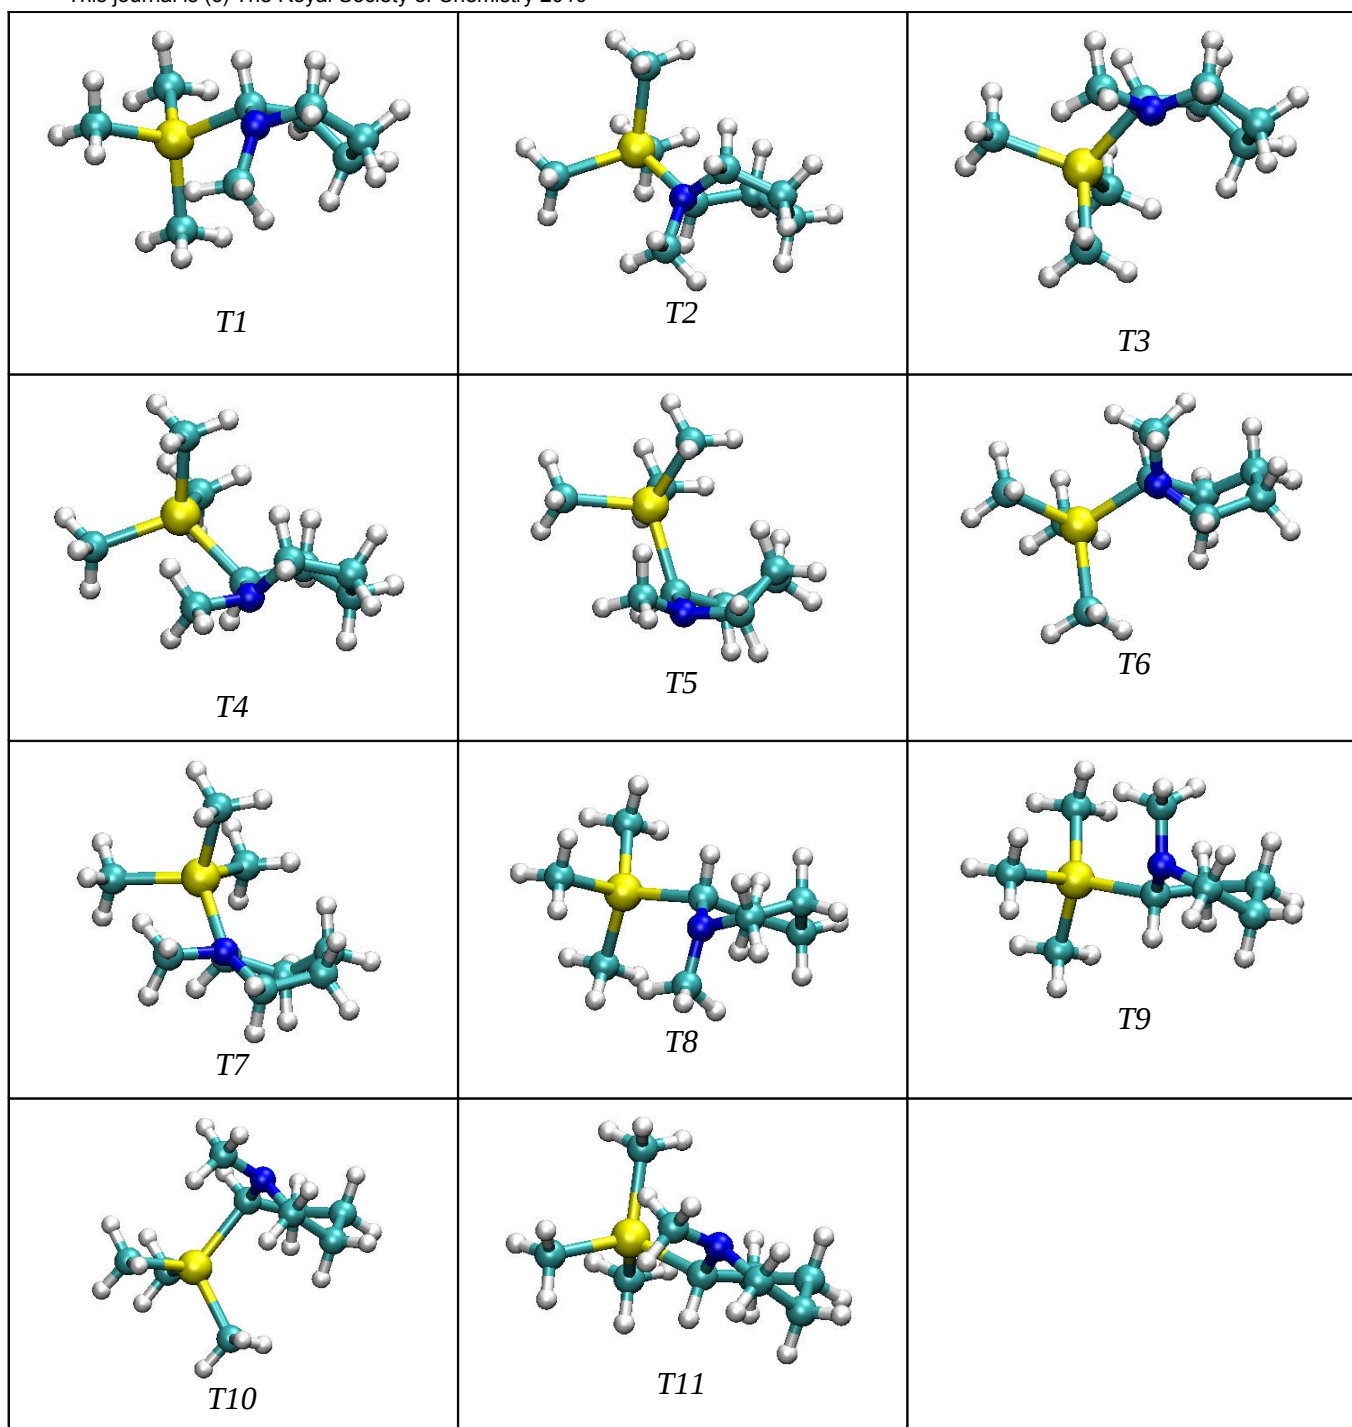

**Table S3** Energy differences, including ZPE correction at 298.15 K, and calculated  $^3J$  of the conformers of *N*-methyl-2-(trimethylstannyl)piperidine. In parenthesis calculated dihedral angles.

| Model | $\Delta E$ (kcal/mol) | $^3J(\text{calc})$ |                    |                    |
|-------|-----------------------|--------------------|--------------------|--------------------|
|       |                       | $\phi$             |                    |                    |
|       |                       | SnCCC              | SnCNC              | SnCNMe             |
| C4    | 0.0000                | -46.9<br>(179.2°)  | -43.1<br>(-178°)   | -9.4<br>(56.7°)    |
| C3    | 0.2290                | -16.1<br>(-78.6)   | -13.1<br>(72.6°)   | -10.5<br>(-58.6)   |
| C2    | 3.0371                | -38.7<br>(-173.2°) | -37.7<br>(172.5)   | -10.8<br>(-57.0°)  |
| C1    | 3.2316                | -11.3<br>(-77.9°)  | 0.2<br>(81.7°)     | -52.3<br>(-146.8°) |
| T3    | 6.0296                | -4.6<br>(-89.0°)   | -42.6<br>(153.7)   | -0.1<br>(-77.5)    |
| T7    | 6.0296                | -4.6<br>(89.0°)    | -42.6<br>(-153.8°) | 1.4<br>(77.5°)     |
| B5    | 6.0491                | -4.6<br>(89.0°)    | -42.7<br>(-153.8°) | 1.4<br>(77.5°)     |
| B4    | 6.0516                | -32.6<br>(147.8°)  | -6.5<br>(-80.4°)   | -21.7<br>(56.1°)   |
| T4    | 6.0541                | -33.1<br>(157.8°)  | -4.2<br>(-88.0°)   | -31.1<br>(46.6°)   |
| B6    | 6.0554                | -33.1<br>(-157.8°) | -4.2<br>(88.0°)    | -31.1<br>(-46.6°)  |
| B8    | 6.0566                | -33.1<br>(-157.8°) | -4.2<br>(88.0°)    | -31.1<br>(-46.6°)  |
| B2    | 6.1426                | -4.5<br>(-89.4°)   | -43.2<br>(154.3°)  | 1.3<br>(-77.0°)    |
| T11   | 6.6559                | -29.2<br>(157.4°)  | -42.0<br>(168.4°)  | -18.5<br>(41.2°)   |
| T10   | 6.6942                | 0.2<br>(-114.8°)   | -25.3<br>(63.9°)   | -0.3<br>(-68.3°)   |
| B7    | 7.0305                | -56.1<br>(178.4°)  | -27.5<br>(-137.4°) | -4.2<br>(92.7°)    |
| T6    | 7.2075                | -46.1<br>(-165.4°) | -0.8<br>(109.5°)   | -29.0<br>(-117.5°) |
| T2    | 7.2087                | -46.2<br>(165.4°)  | -0.8<br>(-109.5°)  | -28.9<br>(117.4°)  |
| B3    | 7.2100                | -46.3<br>(165.4°)  | -0.9<br>(-109.6°)  | -28.8<br>(117.4°)  |
| T8    | 8.7574                | -32.2<br>(-167.3°) | -41.3<br>(-163.4°) | -6.9<br>(64.1°)    |
| T9    | 8.7618                | -32.2<br>(167.0°)  | -41.2<br>(163.7°)  | -7.1<br>(-63.8°)   |
| T5    | 9.0849                | -18.3<br>(69.5°)   | 11.0<br>(-95.9°)   | -28.4<br>(44.3°)   |
| T10   | 11.0101               | -1.2<br>(-116.2°)  | -35.5<br>(172.4°)  | -28.0<br>(38.5°)   |
| B4    | 11.0120               | -1.0<br>(114.4°)   | -35.0<br>(-171.8°) | -28.5<br>(-40.0°)  |

**B1**

32

N -1.801228 -1.049182 -0.036106  
 C -0.861036 -0.382050 0.855295  
 C -1.356219 0.981412 1.302394  
 C -2.866890 1.112042 1.173318  
 C -3.323048 0.890849 -0.263341  
 C -2.459402 -0.130260 -1.006344  
 H -3.364436 0.388154 1.849029  
 Sn 1.221842 0.046819 -0.018645  
 H -1.046991 1.166210 2.350448  
 H -0.878115 1.786877 0.704934  
 H -3.190084 2.111945 1.522500  
 H -4.383306 0.571504 -0.265206  
 H -3.303976 1.847115 -0.822472  
 H -3.079689 -0.730274 -1.700146  
 H -1.695580 0.390992 -1.637391  
 H -0.632258 -1.066911 1.693389  
 C -1.343689 -2.333610 -0.599442  
 H -2.096925 -2.727281 -1.294408  
 H -0.373835 -2.274249 -1.132059  
 H -1.230703 -3.052881 0.223109  
 C 2.170166 -1.770272 -0.731196  
 C 0.858112 1.364361 -1.710731  
 C 2.441060 1.021420 1.483122  
 H 1.539478 1.133186 -2.526817  
 H -0.175760 1.206761 -2.036739  
 H 0.988492 2.402448 -1.411018  
 H 3.233004 1.591777 1.000589  
 H 1.816343 1.693087 2.070775  
 H 2.882223 0.271108 2.137290  
 H 2.901912 -1.532699 -1.500937  
 H 2.662706 -2.284238 0.091964  
 H 1.389696 -2.412680 -1.150273

**B3**

32

N -1.645277 -0.709905 -0.349120  
 C -0.769568 -0.091704 0.673333  
 C -1.276832 1.276900 1.159747  
 C -2.797730 1.256500 1.346837  
 C -3.509692 0.953204 0.009800  
 C -2.553354 0.245377 -0.972876  
 C -2.274257 -1.947496 0.075412  
 H -3.046341 0.488363 2.083954  
 Sn 1.298302 -0.043274 -0.111770  
 H -0.774397 1.527178 2.096398  
 H -1.016139 2.072240 0.454963  
 H -3.147284 2.203874 1.761698  
 H -4.395344 0.340952 0.188906  
 H -3.866110 1.876307 -0.454504  
 H -3.116623 -0.272005 -1.751453  
 H -1.944823 0.994402 -1.485821  
 H -0.747203 -0.757615 1.539264  
 H -2.836746 -2.375385 -0.756293  
 H -1.507827 -2.670699 0.359267  
 H -2.960410 -1.840023 0.931930  
 C 1.942208 -2.080217 -0.505467  
 C 1.326546 1.073325 -1.976168  
 C 2.689884 0.884764 1.288306  
 H 2.317010 1.017378 -2.426344  
 H 0.602061 0.650723 -2.670333  
 H 1.083032 2.120989 -1.804668  
 H 3.694831 0.886026 0.867287  
 H 2.396823 1.914104 1.491047  
 H 2.707784 0.334815 2.285815  
 H 2.909635 -2.076852 -1.006196  
 H 2.034204 -2.638640 0.425277  
 H 1.217330 -2.579204 -1.146587

**B5**

32

C -2.176825 -2.408146 -1.461531  
 C -1.077046 -3.060106 -0.610371  
 N -0.047215 -2.083066 -0.266239  
 C -0.530914 -1.026871 0.639703  
 C -2.033286 -0.760690 0.429919  
 C -2.420729 -0.947038 -1.035086  
 Sn 0.685097 0.813737 0.356985  
 C 1.526694 0.878978 -1.641817  
 C -0.559556 2.574195 0.659436  
 C 2.293954 0.899942 1.821659  
 H -1.510758 -3.523094 0.293406  
 H -2.621286 -1.456663 1.037675  
 H -0.377050 -1.329203 1.688982  
 H -2.299222 0.236934 0.781597  
 H -3.464038 -0.670600 -1.195631  
 H -1.821443 -0.276770 -1.655833  
 H -3.094546 -2.992168 -1.359160  
 H -1.895385 -2.443652 -2.514989  
 C 1.168267 -2.702252 0.216327  
 H -0.604230 -3.868480 -1.169976  
 H 2.271986 1.670585 -1.707478  
 H 1.994891 -0.073701 -1.881203  
 H 0.741700 1.072615 -2.371144  
 H 0.053244 3.469715 0.561277  
 H -1.356453 2.616037 -0.081699  
 H -1.005264 2.567373 1.653423  
 H 2.778097 1.875178 1.781923  
 H 1.898904 0.748569 2.825618  
 H 3.040696 0.132647 1.622338  
 H 1.949360 -1.951571 0.352049  
 H 1.035325 -3.216257 1.185115  
 H 1.530219 -3.431923 -0.508690

**B2**

32

N -0.947299 0.137422 -1.709734  
 C 0.298444 0.522925 -1.025372  
 C 0.327574 2.035329 -0.735923  
 C -1.075237 2.560417 -0.440451  
 C -1.977297 2.374982 -1.676320  
 C -1.496403 1.202769 -2.544714  
 H -1.494238 2.013682 0.407586  
 H 1.168243 0.274923 -1.656088  
 H 1.008483 2.256774 0.086793  
 H 0.725302 2.571219 -1.604314  
 H -1.039565 3.610673 -0.146598  
 H -3.006618 2.199923 -1.359778  
 H -1.982905 3.283995 -2.282454  
 H -2.332986 0.792369 -3.112057  
 H -0.759166 1.550288 -3.289688  
 Sn 0.538200 -0.685326 0.827807  
 C -0.811362 -1.114309 -2.422428  
 H -1.767907 -1.403381 -2.858871  
 H -0.061919 -1.069635 -3.232750  
 H -0.504459 -1.908062 -1.738258  
 C 2.125270 -2.150543 0.557533  
 C 1.113802 0.599351 2.488364  
 C -1.309373 -1.705317 1.338447  
 H 1.238181 -0.006914 3.385131  
 H 2.056546 1.103186 2.278545  
 H 0.349900 1.351506 2.680026  
 H 2.284742 -2.702415 1.483256  
 H 1.864087 -2.857578 -0.228820  
 H 3.055737 -1.654151 0.284094  
 H -1.323506 -1.934497 2.403130  
 H -2.159067 -1.069995 1.096564  
 H -1.399357 -2.635102 0.779035

**B4**

32

C -1.038067 -3.010826 -0.129402  
 N -0.034685 -1.961021 0.018475  
 C -0.672144 -0.693758 0.403813  
 C -2.031621 -0.423546 -0.321226  
 C -2.179460 -1.265706 -1.591478  
 C -2.027015 -2.769255 -1.296169  
 H -1.590690 -3.059372 0.812696  
 H -2.856566 -0.667787 0.356455  
 C 0.957813 -1.953770 -1.040584  
 H -0.895266 -0.785407 1.473041  
 Sn 0.647703 1.071923 0.399004  
 H -2.160615 0.633406 -0.567021  
 H -3.146678 -1.069225 -2.057739  
 H -1.427225 -0.952608 -2.318521  
 H -2.996708 -3.202084 -1.036523  
 H -1.692862 -3.287480 -2.197200  
 H -0.533911 -3.972698 -0.245154  
 H 1.365643 -2.961227 -1.146218  
 H 0.596481 -1.638643 -2.030814  
 H 1.790743 -1.302741 -0.771791  
 C -0.453360 2.601664 1.480581  
 C 2.510044 0.697034 1.451747  
 C 1.056608 1.810966 -1.604191  
 H 0.122773 3.525880 1.505864  
 H -1.409539 2.802260 0.999261  
 H -0.639001 2.279721 2.504505  
 H 3.066827 1.627584 1.556039  
 H 2.300992 0.300446 2.444157  
 H 3.125224 -0.021177 0.912855  
 H 1.574334 2.767435 -1.541512  
 H 1.681761 1.108191 -2.152121  
 H 0.126919 1.954935 -2.153068

**B6**

32

C -0.270959 -1.583090 -2.289721  
 N 0.827109 -0.766714 -1.796200  
 C 0.386031 0.403770 -1.049298  
 C -0.871011 1.019281 -1.699805  
 C -0.929819 0.695455 -3.193911  
 C -1.037771 -0.826295 -3.392752  
 H -0.955972 -1.874079 -1.474315  
 H -1.786417 0.638727 -1.236250  
 Sn 0.026295 0.189289 1.174716  
 H 1.200371 1.133253 -1.089294  
 H -0.872369 2.096513 -1.528116  
 H -1.777208 1.200582 -3.661593  
 H -0.027593 1.070174 -3.679975  
 H -2.085517 -1.136173 -3.377960  
 H -0.642505 -1.097664 -4.372975  
 C 1.900998 -1.503274 -1.178156  
 H 0.142108 -2.510953 -2.685988  
 C -0.984131 2.013193 1.810392  
 C -1.247734 -1.486448 1.742097  
 C 1.875882 0.064502 2.320684  
 H -1.135157 1.989343 2.889333  
 H -0.386425 2.890175 1.564041  
 H -1.954998 2.105638 1.325713  
 H 1.664143 0.225192 3.377477  
 H 2.336242 -0.914803 2.200332  
 H 2.581733 0.825326 1.989237  
 H -1.490620 -1.415936 2.802200  
 H -2.174815 -1.472445 1.170779  
 H -0.739606 -2.432201 1.560564  
 H 2.269857 -2.269913 -1.860600  
 H 2.728647 -0.830756 -0.945762  
 H 1.604253 -2.002116 -0.237393

| <b>B7</b> |           |           | <b>C4</b> |    |           | <b>C2</b> |           |    |           |           |           |
|-----------|-----------|-----------|-----------|----|-----------|-----------|-----------|----|-----------|-----------|-----------|
| 32        |           |           | 32        |    |           | 32        |           |    |           |           |           |
| C         | 1.883607  | -2.775186 | -1.501792 | C  | -2.105973 | 1.193491  | 0.210789  | C  | -2.204753 | 1.331576  | -0.160520 |
| C         | 2.417810  | -1.724783 | -0.536821 | C  | -1.282080 | 0.110396  | -0.473482 | C  | -1.429115 | 0.020572  | -0.327362 |
| N         | 1.376397  | -1.160933 | 0.371197  | N  | 0.109098  | 0.097522  | -0.011672 | C  | 0.015371  | 0.181436  | 0.168643  |
| C         | 0.066921  | -0.953636 | -0.292507 | C  | 0.214771  | -0.094471 | 1.438506  | N  | 0.736630  | 1.299850  | -0.448430 |
| C         | 0.157600  | -0.939902 | -1.801143 | C  | -0.591192 | 0.972263  | 2.189571  | C  | 0.005967  | 2.558167  | -0.259583 |
| C         | 0.728355  | -2.244948 | -2.344647 | C  | -2.048874 | 1.029135  | 1.726501  | C  | -1.440510 | 2.508714  | -0.784747 |
| H         | 1.559199  | -3.671720 | -0.935343 | H  | -0.182593 | -1.089570 | 1.719360  | C  | 1.171290  | 1.018837  | -1.806054 |
| H         | -0.687289 | -1.699573 | 0.041951  | Sn | 2.301948  | -0.048777 | 2.181250  | Sn | 1.111320  | 4.352161  | -0.913454 |
| H         | 2.844417  | -0.867334 | -1.094999 | H  | -0.547669 | 0.773416  | 3.262181  | C  | 0.909344  | 4.724429  | -3.046880 |
| C         | 1.257693  | -1.904618 | 1.648921  | H  | -0.134347 | 1.954306  | 2.029243  | C  | 0.233009  | 6.033220  | 0.148884  |
| Sn        | -0.720928 | 1.014509  | 0.371408  | H  | -2.557208 | 0.102270  | 2.012441  | C  | 3.209988  | 4.197448  | -0.384801 |
| H         | -0.849541 | -0.763621 | -2.231654 | H  | -2.575837 | 1.845331  | 2.226561  | H  | -0.050435 | 2.710440  | 0.825616  |
| H         | 0.779738  | -0.085346 | -2.143220 | H  | -3.135895 | 1.146608  | -0.150131 | H  | -1.954130 | 3.447155  | -0.557851 |
| H         | -0.069946 | -3.010985 | -2.399484 | H  | -1.708671 | 2.172969  | -0.069482 | H  | -1.447178 | 2.410847  | -1.874750 |
| H         | 1.055410  | -2.089134 | -3.390987 | H  | -1.759178 | -0.872998 | -0.298832 | H  | -2.346406 | 1.529923  | 0.907613  |
| H         | 3.246041  | -2.141111 | 0.070453  | H  | -1.274933 | 0.271285  | -1.553634 | H  | -3.203306 | 1.246204  | -0.596448 |
| H         | 2.706183  | -3.124642 | -2.154772 | C  | 0.874224  | -0.870848 | -0.773495 | H  | -1.918230 | -0.788517 | -0.221308 |
| H         | 0.574297  | -1.354313 | 2.319825  | C  | 2.221356  | 0.344555  | 4.318449  | H  | -1.427838 | -0.275309 | -1.380577 |
| H         | 0.880786  | -2.932446 | 1.531710  | C  | 3.323815  | -1.951991 | 1.925690  | H  | 0.002822  | 0.354397  | 1.249981  |
| H         | 2.241235  | -1.952515 | 2.134314  | C  | 3.429498  | 1.537326  | 1.220147  | H  | 0.586103  | -0.734277 | -0.000464 |
| C         | -2.690719 | 1.261832  | -0.453201 | H  | 4.438477  | 1.569089  | 1.629492  | H  | 1.372769  | 5.678123  | -3.297178 |
| C         | -0.813859 | 0.968276  | 2.520047  | H  | 3.488718  | 1.370816  | 0.146234  | H  | 1.393483  | 3.938073  | -3.623687 |
| C         | 0.554862  | 2.597862  | -0.318704 | H  | 2.948269  | 2.497831  | 1.396663  | H  | -0.142556 | 4.765540  | -3.326472 |
| H         | -2.905797 | 2.318271  | -0.615357 | H  | 4.253136  | -1.944589 | 2.494292  | H  | 3.732788  | 5.108926  | -0.671956 |
| H         | -2.763898 | 0.740776  | -1.408923 | H  | 2.698638  | -2.792304 | 2.292242  | H  | 3.312570  | 4.055975  | 0.689883  |
| H         | -3.441135 | 0.854033  | 0.224358  | H  | 3.556334  | -2.135734 | 0.878277  | H  | 3.670387  | 3.351327  | -0.891425 |
| H         | -0.021624 | 3.508537  | -0.481675 | H  | 3.225422  | 0.282093  | 4.736795  | H  | 0.744451  | 6.955672  | -0.123643 |
| H         | 1.333986  | 2.802113  | 0.415978  | H  | 1.824000  | 1.339069  | 4.514491  | H  | -0.822114 | 6.135137  | -0.102142 |
| H         | 1.028568  | 2.308811  | -1.258069 | H  | 1.591538  | -0.389595 | 4.819529  | H  | 0.323554  | 5.890299  | 1.224994  |
| H         | -0.314137 | 1.836650  | 2.948414  | H  | 1.938575  | -0.783989 | -0.553739 | H  | 1.847303  | 1.803032  | -2.150440 |
| H         | -1.848282 | 0.953630  | 2.862145  | H  | 0.571919  | -1.913733 | -0.572626 | H  | 1.730245  | 0.081793  | -1.816016 |
| H         | -0.310226 | 0.061640  | 2.875628  | H  | 0.743739  | -0.685117 | -1.840218 | H  | 0.365137  | 0.931159  | -2.550140 |
| <b>B8</b> |           |           | <b>C3</b> |    |           | <b>C1</b> |           |    |           |           |           |
| 32        |           |           | 32        |    |           | 32        |           |    |           |           |           |
| C         | 2.422019  | 1.069225  | -2.471344 | C  | -2.336222 | 0.860018  | 1.340696  | N  | -2.523656 | -0.212009 | 1.886688  |
| C         | 2.418612  | -0.011573 | -1.371648 | C  | -2.205769 | 0.934177  | -0.180983 | C  | -2.325854 | 1.197486  | 1.549000  |
| N         | 2.040860  | 0.576458  | -0.095990 | C  | -1.080195 | 0.016482  | -0.658547 | C  | -2.365417 | 1.505182  | 0.044498  |
| C         | 0.648432  | 1.001973  | -0.046097 | C  | 0.233804  | 0.299664  | 0.072866  | C  | -1.367734 | 0.617245  | -0.704069 |
| C         | 0.221328  | 1.616907  | -1.395774 | N  | 0.039426  | 0.217810  | 1.508665  | C  | -1.616909 | -0.856611 | -0.373480 |
| C         | 1.426187  | 2.194442  | -2.141048 | C  | -0.991950 | 1.110871  | 2.019047  | C  | -1.625725 | -1.104251 | -1.144349 |
| H         | 2.167074  | 0.607546  | -3.428356 | H  | -1.366434 | -1.022931 | -0.460686 | Sn | 0.376376  | -1.184851 | 2.102686  |
| Sn        | -0.914927 | -0.502407 | 0.597759  | Sn | 1.259921  | 2.143065  | -0.776686 | C  | 0.122107  | -2.339894 | 3.923579  |
| H         | 3.412470  | -0.447543 | -1.267930 | C  | 0.750645  | 4.104204  | 0.028993  | C  | -3.920436 | -0.628332 | 1.868128  |
| C         | 2.487462  | -0.152604 | 1.064506  | C  | 3.418580  | 1.903216  | -0.590268 | C  | 1.753563  | -2.235159 | 0.781308  |
| H         | 0.576503  | 0.767642  | 0.732022  | C  | 0.824544  | 2.197111  | -2.912468 | C  | 1.281333  | 0.719165  | 2.637949  |
| H         | -0.248827 | 0.870003  | -2.042894 | C  | 1.264814  | 0.289481  | 2.272208  | H  | -2.585322 | -1.149537 | -0.797432 |
| H         | -0.536966 | 2.380563  | -1.217668 | H  | -1.079098 | 0.945158  | 3.094668  | H  | -3.076024 | 1.784308  | 2.082047  |
| H         | 1.105139  | 2.697819  | -3.055098 | H  | -0.703030 | 2.169190  | 1.882593  | H  | -1.351304 | 1.506249  | 1.938083  |
| H         | 1.910145  | 2.946707  | -1.516093 | H  | -2.694545 | -0.131992 | 1.627478  | H  | -3.372846 | 1.335530  | -0.346859 |
| H         | 1.745359  | -0.841431 | -1.648890 | H  | -3.066931 | 1.586002  | 1.703972  | H  | -2.141420 | 2.562744  | -0.116647 |
| H         | 3.424664  | 1.486026  | -2.579485 | H  | -3.148520 | 0.661712  | -0.659863 | H  | -1.433496 | 0.783881  | -1.781273 |
| H         | 2.265625  | 0.415594  | 1.969620  | H  | -1.992432 | 1.966756  | -0.477763 | H  | -0.349073 | 0.892574  | -0.408365 |
| H         | 2.009161  | -1.143686 | 1.168988  | H  | 0.961650  | -0.469341 | -0.197862 | H  | -1.969683 | -2.124737 | 1.329508  |
| H         | 3.566275  | -0.305830 | 1.017544  | H  | 3.927187  | 2.610112  | -1.245394 | H  | 1.058296  | -2.384217 | 4.478687  |
| C         | -2.850069 | 0.396906  | 0.152656  | H  | 3.737700  | 2.085451  | 0.434950  | H  | -0.637145 | -1.874700 | 4.550386  |
| C         | -0.835246 | -2.414465 | -0.446676 | H  | 3.715879  | 0.893689  | -0.872808 | H  | -0.192140 | -3.355881 | 3.687792  |
| C         | -0.881266 | -0.889393 | 2.742249  | H  | 1.301185  | 4.870236  | -0.517219 | H  | 2.249984  | 0.532068  | 3.101074  |
| H         | -2.954990 | 1.355145  | 0.660407  | H  | -0.315773 | 4.296361  | -0.077284 | H  | 1.429769  | 1.342890  | 1.758157  |
| H         | -2.964799 | 0.555626  | -0.918645 | H  | 1.014949  | 4.167271  | 1.083195  | H  | 0.653108  | 1.253144  | 3.348971  |
| H         | -3.646518 | -0.264225 | 0.493335  | H  | 1.411925  | 2.985894  | -3.381992 | H  | 2.708551  | -2.381910 | 1.284921  |
| H         | -1.711816 | -3.007623 | -0.186723 | H  | 1.081896  | 1.248224  | -3.381925 | H  | 1.352509  | -3.210213 | 0.507017  |
| H         | -0.825879 | -2.261033 | -1.524847 | H  | -0.231216 | 2.398434  | -3.088904 | H  | 1.925808  | -1.660484 | -0.127838 |
| H         | 0.059163  | -2.967695 | -0.164613 | H  | -0.939355 | 0.105814  | -1.736956 | H  | -4.503182 | 0.032088  | 2.512559  |
| H         | -0.818105 | 0.045923  | 3.297353  | H  | 1.062296  | 0.068099  | 3.320757  | H  | -4.391463 | -0.626760 | 0.873352  |
| H         | -1.794767 | -1.405724 | 3.036162  | H  | 1.979567  | -0.445699 | 1.900414  | H  | -4.000679 | -1.639290 | 2.270140  |
| H         | -0.026973 | -1.510507 | 3.006553  | H  | 1.747183  | 1.282447  | 2.226048  | H  | -0.870904 | -1.493191 | -0.855503 |



| T3<br>32 |           |           | T2<br>32  |    |           | T5<br>32  |           |    |           |           |           |
|----------|-----------|-----------|-----------|----|-----------|-----------|-----------|----|-----------|-----------|-----------|
| C        | -0.999292 | 0.800667  | -1.028118 | C  | 0.253266  | -1.314826 | -0.199904 | C  | 0.079843  | -1.434837 | -0.093787 |
| N        | 0.138730  | -0.089534 | -1.315750 | C  | 1.112665  | -0.608108 | 0.869364  | N  | 0.817048  | -0.748494 | 0.952124  |
| C        | 0.328015  | -1.124726 | -0.302703 | C  | 0.518249  | 0.772055  | 1.227609  | C  | 0.605020  | 0.702124  | 1.053822  |
| C        | 0.758468  | -0.500739 | 1.033073  | C  | -0.969150 | 0.833718  | 0.863937  | C  | -0.745328 | 1.162637  | 0.500764  |
| C        | 0.085087  | 0.868385  | 1.252794  | C  | -1.169199 | 0.629611  | -0.647820 | C  | -0.923900 | 0.730411  | -0.969381 |
| C        | -1.235303 | 0.927854  | 0.488482  | N  | -0.298165 | -0.425625 | -1.215433 | C  | -0.073511 | -0.510276 | -1.298456 |
| Sn       | -0.659034 | 2.780243  | -1.982882 | H  | -0.584123 | -1.820548 | 0.287469  | Sn | -1.897774 | -2.446226 | 0.410593  |
| C        | 1.463833  | 3.171777  | -2.202519 | H  | -1.508142 | 0.077867  | 1.443120  | H  | -1.541511 | 0.740753  | 1.115154  |
| C        | -1.615335 | 2.863501  | -3.937370 | H  | 2.139848  | -0.492588 | 0.518807  | H  | 0.693793  | 0.993335  | 2.101474  |
| C        | -1.547481 | 4.348902  | -0.762321 | H  | 0.664735  | 0.989842  | 2.287305  | H  | 1.406635  | 1.226857  | 0.520346  |
| H        | -1.918078 | 0.400267  | -1.488095 | H  | 1.042865  | 1.557801  | 0.677531  | H  | -0.825810 | 2.247085  | 0.597691  |
| H        | -0.585915 | -1.730058 | -0.170177 | H  | -1.398621 | 1.796009  | 1.150252  | H  | -1.978873 | 0.520189  | -1.160582 |
| H        | -1.875642 | 0.109180  | 0.833770  | Sn | -3.262042 | 0.190272  | -1.215000 | H  | -0.648577 | 1.545291  | -1.641630 |
| H        | 1.843272  | -0.386395 | 1.052236  | H  | -0.915463 | 1.571300  | -1.140382 | H  | -0.499462 | -1.053207 | -2.142622 |
| H        | -0.077439 | 1.048619  | 2.316649  | C  | 0.671840  | 0.058453  | -2.180891 | H  | 0.928303  | -0.193248 | -1.608264 |
| H        | 0.744214  | 1.664541  | 0.898696  | H  | 1.162788  | -1.247147 | 1.754722  | C  | 0.906258  | -1.459350 | 2.202895  |
| H        | -1.779093 | 1.845405  | 0.176701  | H  | 0.828585  | -2.095543 | -0.700565 | H  | 0.659364  | -2.316627 | -0.385156 |
| C        | 0.085638  | -0.627770 | -2.657886 | H  | 1.217674  | -0.786087 | -2.605229 | H  | 1.275123  | -2.472444 | 2.029342  |
| H        | 0.498072  | -1.186689 | 1.842666  | H  | 0.155304  | 0.560212  | -3.000928 | H  | 1.609564  | -0.962432 | 2.871397  |
| H        | 1.098744  | -1.810191 | -0.658091 | H  | 1.408407  | 0.769124  | -1.770469 | H  | -0.061050 | -1.546973 | 2.731810  |
| H        | 1.621144  | 4.010327  | -2.879598 | C  | -3.802047 | -1.781189 | -0.476614 | C  | -2.889111 | -2.903684 | -1.478797 |
| H        | 1.900814  | 3.413654  | -1.234905 | C  | -4.660821 | 1.654574  | -0.404349 | C  | -1.499218 | -4.360759 | 1.374160  |
| H        | 1.965880  | 2.291854  | -2.599769 | C  | -3.410773 | 0.192823  | -3.382165 | C  | -3.340255 | -1.376117 | 1.650229  |
| H        | -1.596652 | 3.885674  | -4.314053 | H  | -4.401559 | -0.139364 | -3.689830 | H  | -3.758167 | -3.534194 | -1.292172 |
| H        | -1.098810 | 2.221227  | -4.649240 | H  | -3.242036 | 1.194527  | -3.775483 | H  | -3.221513 | -1.991499 | -1.972770 |
| H        | -2.652698 | 2.538780  | -3.864584 | H  | -2.667945 | -0.482141 | -3.804167 | H  | -2.213429 | -3.436055 | -2.147466 |
| H        | -1.417331 | 5.309515  | -1.259722 | H  | -5.676978 | 1.405761  | -0.708813 | H  | -2.411444 | -4.956212 | 1.403687  |
| H        | -2.613459 | 4.173534  | -0.622155 | H  | -4.616240 | 1.662311  | 0.683992  | H  | -0.742338 | -4.915015 | 0.819797  |
| H        | -1.068607 | 4.396332  | 0.214683  | H  | -4.422758 | 2.652396  | -0.771008 | H  | -1.145422 | -4.212199 | 2.393274  |
| H        | 0.059607  | 0.180793  | -3.391054 | H  | -4.793591 | -2.052742 | -0.837043 | H  | -2.892121 | -1.067010 | 2.593282  |
| H        | 0.973971  | -1.228379 | -2.855902 | H  | -3.085393 | -2.518626 | -0.834280 | H  | -3.716769 | -0.494699 | 1.133265  |
| H        | -0.803367 | -1.259380 | -2.834414 | H  | -3.813172 | -1.797536 | 0.612386  | H  | -4.179051 | -2.038459 | 1.863852  |

  

| T1<br>32 |           |           | T4<br>32  |    |           | T6<br>32  |           |    |           |           |           |
|----------|-----------|-----------|-----------|----|-----------|-----------|-----------|----|-----------|-----------|-----------|
| N        | 0.048497  | -0.037607 | -1.405799 | N  | 0.323291  | -1.389315 | -0.221707 | C  | 0.079843  | -1.434837 | -0.093787 |
| C        | 0.044255  | -1.180544 | -0.498018 | C  | 0.921932  | -0.786058 | 0.958754  | N  | 0.817048  | -0.748494 | 0.952124  |
| C        | 0.767471  | -0.914668 | 0.845582  | C  | 0.397405  | 0.652401  | 1.140666  | C  | 0.605020  | 0.702124  | 1.053822  |
| C        | 0.744625  | 0.582981  | 1.201736  | C  | -1.011297 | 0.805098  | 0.541338  | C  | -0.745328 | 1.162637  | 0.500764  |
| C        | -0.532081 | 1.264275  | 0.700867  | C  | -1.786095 | -0.504515 | 0.700360  | C  | -0.923900 | 0.730411  | -0.969381 |
| C        | -0.733267 | 1.069774  | -0.838508 | C  | -1.102840 | -1.649474 | -0.077009 | C  | -0.073511 | -0.510276 | -1.298456 |
| H        | -1.784614 | 0.799034  | -0.989364 | Sn | -1.751798 | -3.625801 | 0.814441  | Sn | -1.897774 | -2.446226 | 0.410593  |
| C        | 1.351247  | 0.244334  | -1.980071 | C  | -1.513598 | -5.293885 | -0.567778 | H  | -1.541511 | 0.740753  | 1.115154  |
| H        | -1.002390 | -1.430730 | -0.304908 | C  | -0.780984 | -4.147916 | 2.695421  | H  | 0.693793  | 0.993335  | 2.101474  |
| H        | -1.387760 | 0.835635  | 1.233240  | C  | -3.886323 | -3.444562 | 1.217648  | H  | 1.406635  | 1.226857  | 0.520346  |
| H        | 1.800719  | -1.264848 | 0.802251  | H  | 0.723148  | -1.386174 | 1.863819  | H  | -0.825810 | 2.247085  | 0.597691  |
| H        | 0.837302  | 0.714935  | 2.281345  | H  | -1.849397 | -0.730933 | 1.769194  | H  | -1.978873 | 0.520189  | -1.160582 |
| H        | 1.611915  | 1.081269  | 0.763672  | H  | 1.078230  | 1.359156  | 0.663499  | H  | -0.648577 | 1.545291  | -1.641630 |
| H        | -0.514469 | 2.320451  | 0.980867  | H  | -1.543506 | 1.625650  | 1.026510  | H  | -0.499462 | -1.053207 | -2.142622 |
| Sn       | -0.624967 | 2.971808  | -1.947468 | H  | -0.938676 | 1.054791  | -0.518410 | H  | 0.928303  | -0.193248 | -1.608264 |
| H        | 0.280613  | -1.495863 | 1.633128  | H  | -2.815062 | -0.400081 | 0.353624  | C  | 0.906258  | -1.459350 | 2.202895  |
| H        | 0.482199  | -2.041957 | -1.006844 | H  | -1.522987 | -1.694196 | -1.086154 | H  | 0.659364  | -2.316627 | -0.385156 |
| H        | 1.753869  | -0.677030 | -2.406016 | C  | 1.076228  | -2.475866 | -0.796340 | H  | 1.275123  | -2.472444 | 2.029342  |
| H        | 1.254765  | 0.955934  | -2.801189 | H  | 0.383838  | 0.896926  | 2.205579  | H  | 1.609564  | -0.962432 | 2.871397  |
| H        | 2.104041  | 0.642008  | -1.283274 | H  | 2.004450  | -0.779476 | 0.829561  | H  | -0.061050 | -1.546973 | 2.731810  |
| C        | -0.942385 | 2.689804  | -4.077418 | H  | -2.071344 | -6.155729 | -0.202260 | C  | -2.889111 | -2.903684 | -1.478797 |
| C        | -2.255677 | 4.175750  | -1.164204 | H  | -1.892935 | -5.028709 | -1.554047 | C  | -1.499218 | -4.360759 | 1.374160  |
| C        | 1.237249  | 4.039928  | -1.604276 | H  | -0.464118 | -5.568794 | -0.659807 | C  | -3.340255 | -1.376117 | 1.650229  |
| H        | 1.177160  | 5.030630  | -2.053410 | H  | -4.266675 | -4.391007 | 1.601139  | H  | -3.758167 | -3.534194 | -1.292172 |
| H        | 1.419100  | 4.153737  | -0.536390 | H  | -4.074760 | -2.668763 | 1.958371  | H  | -3.221513 | -1.991499 | -1.972770 |
| H        | 2.074686  | 3.503693  | -2.047105 | H  | -4.430372 | -3.196665 | 0.306827  | H  | -2.213429 | -3.436055 | -2.147466 |
| H        | -1.052046 | 3.658290  | -4.564047 | H  | -1.265891 | -5.024955 | 3.123734  | H  | -2.411444 | -4.956212 | 1.403687  |
| H        | -0.104298 | 2.163019  | -4.530017 | H  | 0.271890  | -4.373113 | 2.533133  | H  | -0.742338 | -4.915015 | 0.819797  |
| H        | -1.848647 | 2.109312  | -4.243292 | H  | -0.857181 | -3.326089 | 3.405966  | H  | -1.145422 | -4.212199 | 2.393274  |
| H        | -2.248633 | 5.159542  | -1.632035 | H  | 0.620144  | -2.788554 | -1.737354 | H  | -2.892121 | -1.067010 | 2.593282  |
| H        | -3.211949 | 3.698076  | -1.373623 | H  | 2.096897  | -2.153736 | -1.006071 | H  | -3.716769 | -0.494699 | 1.133265  |
| H        | -2.157982 | 4.303397  | -0.087009 | H  | 1.129788  | -3.364974 | -0.141699 | H  | -4.179051 | -2.038459 | 1.863852  |

| <b>T7</b> |           |           | <b>T9</b>  |    |           | <b>T11</b> |           |    |           |           |           |
|-----------|-----------|-----------|------------|----|-----------|------------|-----------|----|-----------|-----------|-----------|
| 32        |           |           | 32         |    |           | 32         |           |    |           |           |           |
| C         | -0.011429 | -1.173078 | -0.239878  | C  | -0.390961 | -0.332685  | -1.442323 | C  | -0.106663 | -0.403801 | -1.520783 |
| N         | 0.329036  | -0.337829 | 0.924923   | N  | 0.255474  | -1.293834  | -0.551075 | N  | 0.170413  | -1.333836 | -0.425123 |
| C         | 0.869527  | 0.968190  | 0.556328   | C  | 1.077206  | -0.612147  | 0.468988  | C  | 1.003667  | -0.711061 | 0.614359  |
| C         | -0.206103 | 1.823903  | -0.129091  | C  | 0.583475  | 0.805933   | 0.827835  | C  | 0.622119  | 0.756075  | 0.868696  |
| C         | -1.144912 | 0.956324  | -0.990542  | C  | -0.938856 | 0.904601   | 0.718610  | C  | -0.834313 | 1.001497  | 0.491730  |
| C         | -0.415562 | -0.305195 | -1.446291  | C  | -1.410771 | 0.577679   | -0.719021 | C  | -1.045027 | 0.714017  | -1.007584 |
| Sn        | -1.610519 | -2.615116 | 0.316596   | C  | -0.606963 | -2.336412  | -0.025455 | C  | 0.725281  | -2.615966 | -0.799304 |
| H         | -0.785403 | 2.358833  | 0.624898   | H  | 0.412446  | 0.305272   | -1.823188 | H  | 0.834161  | 0.055102  | -1.876919 |
| C         | 1.167032  | -1.038961 | 1.873605   | H  | -1.392601 | 0.205066   | 1.425249  | H  | -1.474495 | 0.345170  | 1.083947  |
| H         | 1.213185  | 1.462140  | 1.466327   | H  | 2.113250  | -0.556408  | 0.117581  | H  | 2.072070  | -0.768322 | 0.341087  |
| H         | 1.756320  | 0.867816  | -0.093899  | H  | 0.920293  | 1.065198   | 1.833523  | H  | 0.808964  | 1.005577  | 1.914386  |
| H         | 0.285294  | 2.579990  | -0.746048  | H  | 1.038574  | 1.539146   | 0.156628  | H  | 1.261090  | 1.415591  | 0.276259  |
| H         | -2.025014 | 0.674743  | -0.407589  | H  | -1.281214 | 1.898100   | 1.013647  | H  | -1.129531 | 2.026408  | 0.725148  |
| H         | -1.508363 | 1.522593  | -1.849570  | H  | -2.401666 | 0.119584   | -0.676482 | H  | -2.095194 | 0.453708  | -1.164225 |
| H         | -1.025109 | -0.879346 | -2.145201  | H  | -1.526828 | 1.498913   | -1.297076 | H  | -0.860685 | 1.618847  | -1.592160 |
| H         | 0.478254  | -0.008794 | -2.005515  | Sn | -1.158055 | -1.227696  | -3.307823 | Sn | -0.999326 | -1.285575 | -3.340420 |
| H         | 0.857009  | -1.786889 | -0.531619  | H  | 1.085894  | -1.233606  | 1.366205  | H  | 0.880519  | -1.298386 | 1.528845  |
| H         | 0.676077  | -1.953885 | 2.211037   | H  | -1.052855 | -2.898298  | -0.848397 | H  | 0.038910  | -3.162504 | -1.446679 |
| H         | 2.146437  | -1.328397 | 1.452395   | H  | -0.013391 | -3.040280  | 0.559096  | H  | 1.698731  | -2.537947 | -1.315202 |
| H         | 1.345009  | -0.414117 | 2.749375   | H  | -1.430797 | -1.983433  | 0.615360  | H  | 0.878262  | -3.220251 | 0.097033  |
| C         | -2.819100 | -1.833510 | 1.940336   | C  | -1.218691 | 0.347051   | -4.806539 | C  | -1.665067 | 0.386640  | -4.557812 |
| C         | -2.891848 | -2.993070 | -1.402471  | C  | 0.170860  | -2.801637  | -3.987312 | C  | 0.422047  | -2.429312 | -4.522532 |
| C         | -0.747798 | -4.523929 | 0.911154   | C  | -3.176703 | -2.007993  | -3.085007 | C  | -2.715943 | -2.514535 | -2.830441 |
| H         | -1.535779 | -5.269386 | 1.013383   | H  | -1.588317 | -0.050430  | -5.751123 | H  | -2.105896 | 0.015647  | -5.482326 |
| H         | -0.038768 | -4.868399 | 0.159141   | H  | -1.879556 | 1.151696   | -4.486810 | H  | -2.410998 | 0.976259  | -4.027558 |
| H         | -0.228186 | -4.434415 | 1.864072   | H  | -0.222185 | 0.756348   | -4.967975 | H  | -0.823329 | 1.030883  | -4.808763 |
| H         | -3.645883 | -3.732364 | -1.134138  | H  | -0.187009 | -3.207190  | -4.932835 | H  | -0.014109 | -2.657172 | -5.494533 |
| H         | -3.396811 | -2.080516 | -1.716092  | H  | 1.174108  | -2.403875  | -4.131287 | H  | 1.332241  | -1.851270 | -4.676914 |
| H         | -2.312107 | -3.378652 | -2.240288  | H  | 0.217710  | -3.603472  | -3.252915 | H  | 0.680943  | -3.362958 | -4.026665 |
| H         | -3.431408 | -2.627401 | 2.365976   | H  | -3.516238 | -2.410566  | -4.038781 | H  | -3.195685 | -2.873658 | -3.740062 |
| H         | -2.178346 | -1.420350 | 2.716761   | H  | -3.209126 | -2.801478  | -2.340319 | H  | -2.410281 | -3.370558 | -2.231525 |
| H         | -3.472303 | -1.043745 | 1.572482   | H  | -3.859191 | -1.215444  | -2.781026 | H  | -3.437748 | -1.931677 | -2.260592 |
| <b>T8</b> |           |           | <b>T10</b> |    |           |            |           |    |           |           |           |
| 32        |           |           | 32         |    |           |            |           |    |           |           |           |
| C         | 0.208828  | -0.252256 | -1.601483  | N  | 0.273730  | -1.214503  | -0.428709 |    |           |           |           |
| C         | 0.547856  | -1.382561 | -0.601979  | C  | 0.946966  | -0.909884  | 0.825365  |    |           |           |           |
| N         | 1.127838  | -0.891910 | 0.646599   | C  | 0.445766  | 0.416475   | 1.430397  |    |           |           |           |
| C         | 0.164803  | -0.059445 | 1.394942   | C  | -0.892567 | 0.818696   | 0.813758  |    |           |           |           |
| C         | -0.870583 | 0.658557  | 0.502724   | C  | -0.746808 | 1.004323   | -0.704332 |    |           |           |           |
| C         | -0.272452 | 1.017656  | -0.858398  | C  | 0.166021  | -0.086378  | -1.330761 |    |           |           |           |
| H         | -0.391100 | -1.869427 | -0.320687  | H  | -1.634204 | 0.045822   | 1.020408  |    |           |           |           |
| C         | 2.455605  | -0.315533 | 0.535505   | H  | 2.044037  | -0.867659  | 0.686350  |    |           |           |           |
| H         | -1.741597 | 0.015190  | 0.352199   | H  | 0.362067  | 0.319091   | 2.513708  |    |           |           |           |
| H         | -0.359233 | -0.684939 | 2.125776   | H  | 1.173986  | 1.209158   | 1.248735  |    |           |           |           |
| H         | 0.729615  | 0.679570  | 1.966021   | H  | -1.259182 | 1.741574   | 1.267237  |    |           |           |           |
| H         | -1.237094 | 1.550153  | 1.015375   | H  | -1.734616 | 0.966419   | -1.169795 |    |           |           |           |
| H         | -0.999199 | 1.560119  | -1.465754  | H  | -0.357377 | 2.005117   | -0.905928 |    |           |           |           |
| H         | 0.567992  | 1.700235  | -0.709137  | H  | -0.301137 | -0.455815  | -2.244412 |    |           |           |           |
| H         | -0.569581 | -0.610120 | -2.281299  | Sn | 2.058708  | 0.841620   | -2.171375 |    |           |           |           |
| H         | 1.066072  | 0.002201  | -2.229309  | H  | 0.753848  | -1.739247  | 1.509987  |    |           |           |           |
| Sn        | 1.653505  | -3.068860 | -1.497748  | C  | 0.754912  | -2.434684  | -1.033155 |    |           |           |           |
| H         | 3.145305  | -1.050931 | 0.117500   | H  | 0.155317  | -2.679087  | -1.911025 |    |           |           |           |
| H         | 2.522101  | 0.588896  | -0.090216  | H  | 1.811094  | -2.376075  | -1.347069 |    |           |           |           |
| H         | 2.824689  | -0.056721 | 1.528607   | H  | 0.666120  | -3.257160  | -0.321559 |    |           |           |           |
| C         | 3.372549  | -2.424264 | -2.665098  | C  | 3.524235  | -0.550685  | -2.990816 |    |           |           |           |
| C         | 2.289599  | -4.441185 | 0.056582   | C  | 1.366772  | 2.076275   | -3.829965 |    |           |           |           |
| C         | 0.284678  | -4.094824 | -2.840804  | C  | 3.110805  | 2.162290   | -0.791318 |    |           |           |           |
| H         | 2.819647  | -5.284802 | -0.383685  | H  | 4.257330  | -0.001846  | -3.581995 |    |           |           |           |
| H         | 2.948103  | -3.936123 | 0.760644   | H  | 4.042012  | -1.075816  | -2.189779 |    |           |           |           |
| H         | 1.422373  | -4.814437 | 0.599078   | H  | 3.036041  | -1.283319  | -3.631703 |    |           |           |           |
| H         | 0.772306  | -4.966426 | -3.275976  | H  | 2.213383  | 2.585697   | -4.289558 |    |           |           |           |
| H         | -0.601284 | -4.426151 | -2.300441  | H  | 0.881165  | 1.460216   | -4.586187 |    |           |           |           |
| H         | -0.025728 | -3.432207 | -3.647683  | H  | 0.656650  | 2.826721   | -3.484663 |    |           |           |           |
| H         | 3.766269  | -3.270372 | -3.227285  | H  | 3.909967  | 2.674401   | -1.326875 |    |           |           |           |
| H         | 3.086094  | -1.643768 | -3.368740  | H  | 2.436334  | 2.911085   | -0.378169 |    |           |           |           |
| H         | 4.158638  | -2.039546 | -2.017462  | H  | 3.548011  | 1.593144   | 0.027627  |    |           |           |           |

**Table S4.** Contributions, in Hz, to the  $^3J(\text{Sn-C-O-C})$  coupling in  $\text{Me}_3\text{Sn-CH}_2\text{-O-CH}_3$ . Scalar ZORA BLYP/TZ2P.

| $\phi / ^\circ$ | DSO   | PSO   | SD     | FC      | TOT    |
|-----------------|-------|-------|--------|---------|--------|
| 0               | -0.04 | -0.43 | 0.315  | -89.925 | -90.09 |
| 15              | -0.04 | -0.47 | 0.325  | -84.395 | -84.59 |
| 30              | -0.04 | -0.42 | 0.325  | -68.225 | -68.35 |
| 45              | -0.03 | -0.24 | 0.285  | -45.005 | -44.99 |
| 60              | -0.02 | -0.09 | 0.196  | -20.306 | -20.22 |
| 75              | -0.01 | 0     | 0.106  | 1.344   | 1.45   |
| 90              | 0.01  | 0.01  | 0.082  | 12.508  | 12.62  |
| 105             | 0.03  | -0.02 | 0.141  | 8.239   | 8.39   |
| 120             | 0.04  | -0.11 | 0.215  | -11.825 | -11.68 |
| 135             | 0.06  | -0.26 | 0.141  | -39.931 | -39.99 |
| 150             | 0.07  | -0.45 | -0.13  | -64.9   | -65.41 |
| 165             | 0.07  | -0.57 | -0.412 | -79.858 | -80.77 |
| 180             | 0.07  | -0.62 | -0.527 | -84.953 | -86.02 |

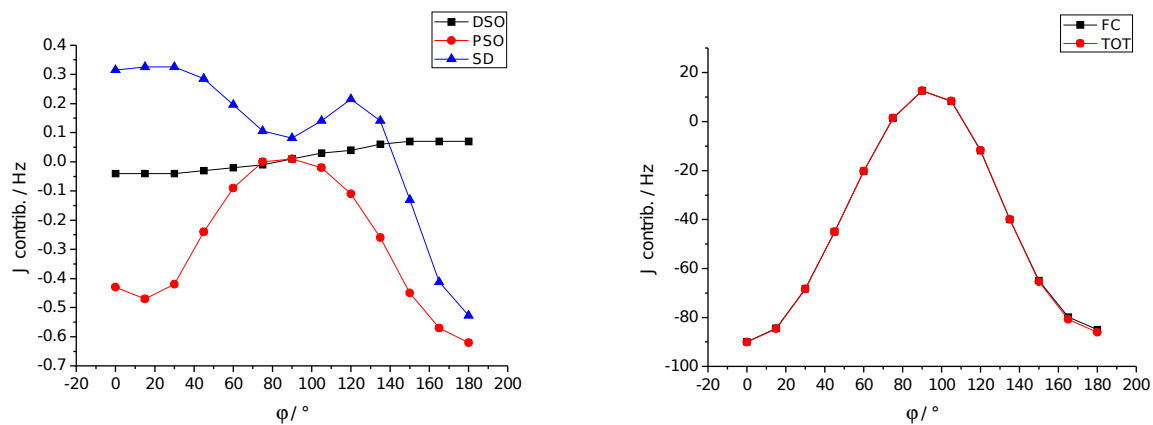

**Figure S1.** Graphical representation of the various contribution of Table S.
